# Supplementary material for: Isolated single iron atoms anchored on a N, S-codoped hierarchically ordered porous carbon framework for highly efficient oxygen reduction
Source: Royal Society of Chemistry journal article supplement (doi:10.1039/d1ta00384d), 2021-01-01
Supplement: d1ta00384d1.pdf [file d1ta00384d1.pdf]

## Supporting Information

### Isolated Single Iron Atoms Anchored on N, S-Codoped Hierarchically Ordered Porous Carbon Framework for Highly Efficient Oxygen Reduction

*Xinghuan Liu<sup>[+]</sup>, Xingwu Zhai<sup>[+]</sup>, Wenbo Sheng, Juan Tu, Zeyu Zhao, Yulin Shi, Caixia Xu, Guixian Ge, Xin Jia\**

X. Liu<sup>[+]</sup>, X. Zhai<sup>[+]</sup>, W. Sheng, J. Tu, Z. Zhao, Prof. Shi, Prof. C. Xu, Prof. X. Jia  
School of Chemistry and Chemical Engineering/Key Laboratory for Green Processing of Chemical Engineering of Xinjiang Bingtuan, Key Laboratory of Materials-Oriented Chemical Engineering of Xinjiang Uygur Autonomous Region, Engineering Research Center of Materials-Oriented Chemical Engineering of Xinjiang Bingtuan, Shihezi University, Shihezi 832003, China.

E-mail: [jiaxin@shzu.edu.cn](mailto:jiaxin@shzu.edu.cn)

Prof. G. Ge

Key Laboratory of Ecophysics and Department of Physics, College of Science, Shihezi University, Shihezi, 832003, PR China, Email: [geguixian@126.com](mailto:geguixian@126.com)

[+] These authors contributed equally to this work.

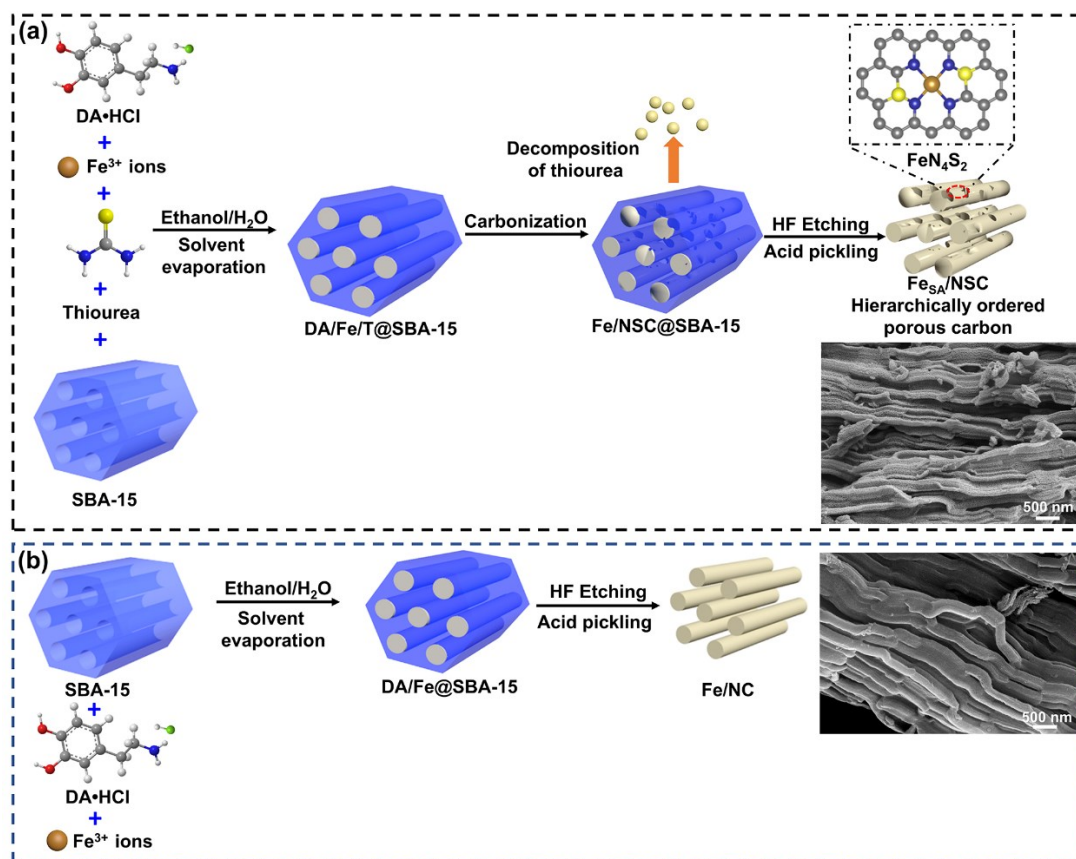

Scheme S1 (a) Synthetic route of  $\text{Fe}_{\text{SA}}/\text{NSC}$  hierarchically ordered porous carbon (HOPC) materials. (b) General synthetic route of ordered mesoporous carbon (OMC) materials.

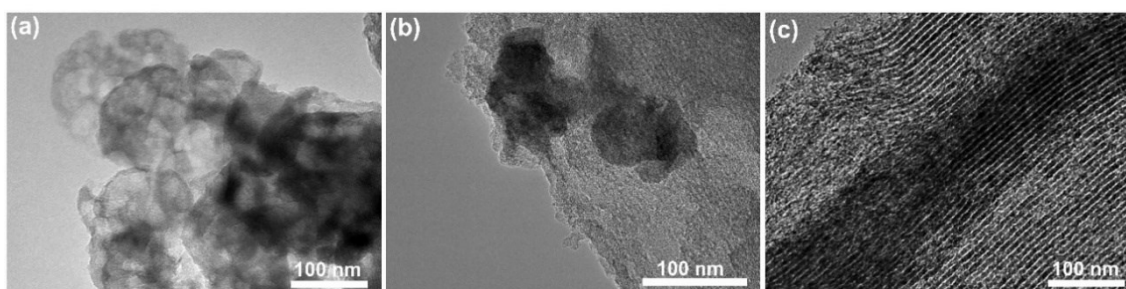

Figure S1 (a) and (b) TEM images of the carbon materials obtained by solvent evaporation process using polydopamine/Fe as precursor; (c) TEM images of the carbon materials prepared solvent evaporation method using dopamine/Fe as precursor.

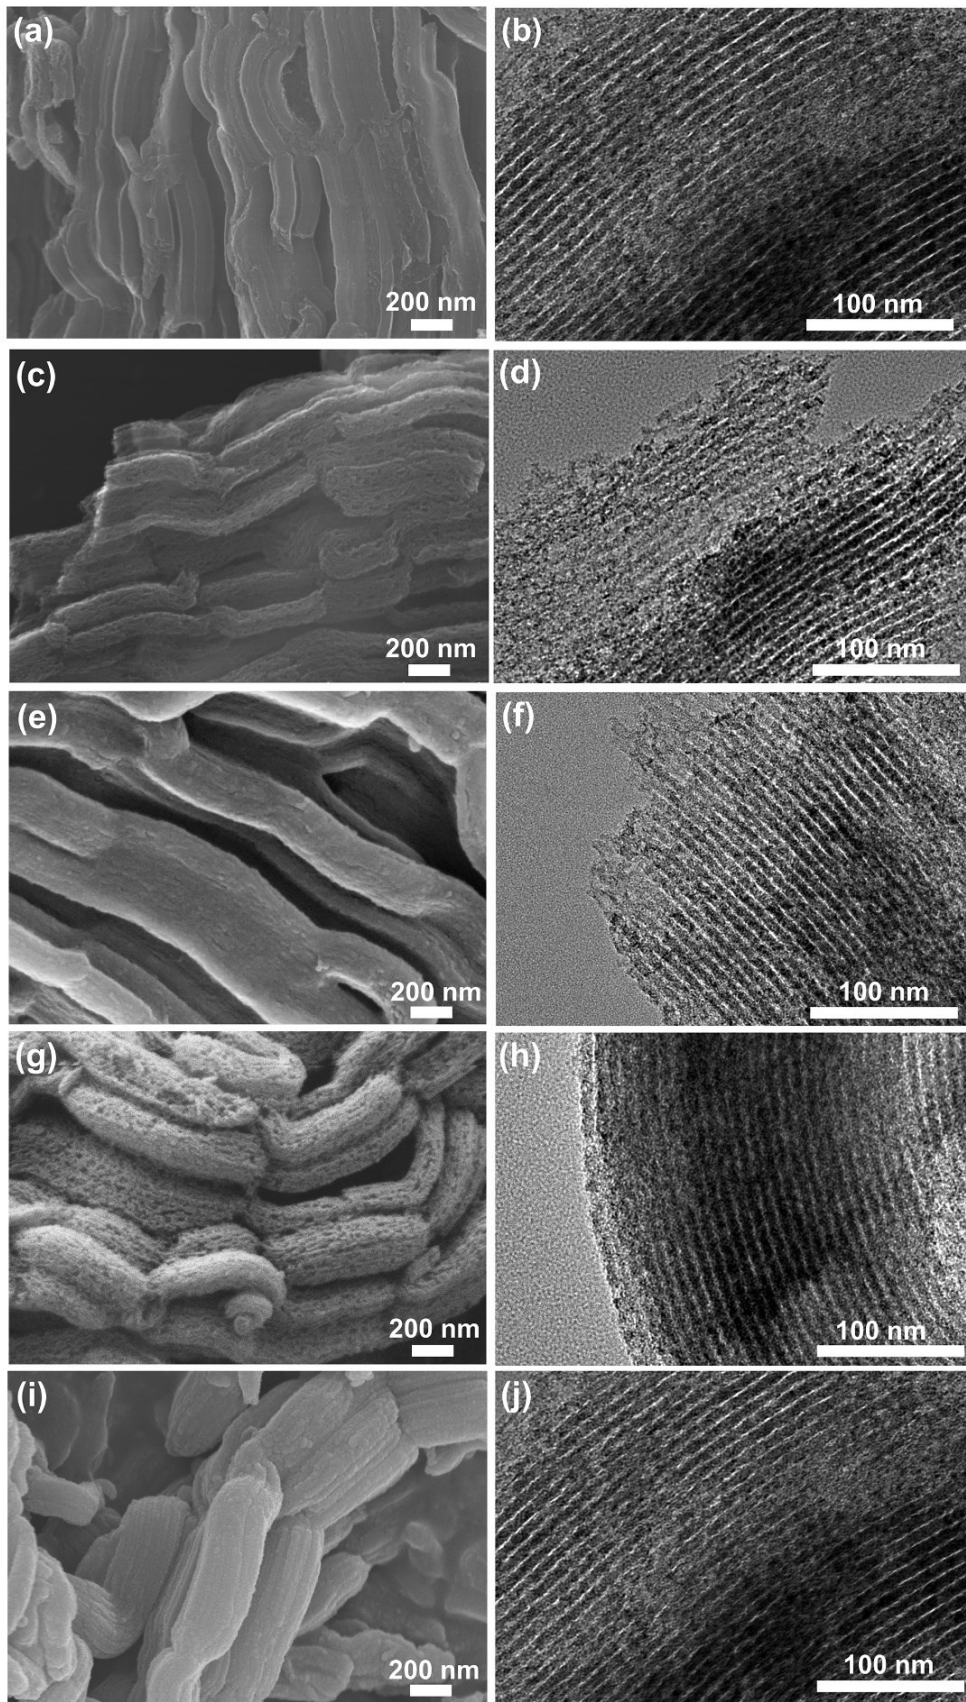

Figure S2 SEM images of (a) Fe/NSC-TO, (c) Fe/NC-UI, (e) Fe/NC, (g) NSC, (i) NC. TEM images of (b) Fe/NSC-TO, (d) Fe/NC-UI, (f) Fe/NC, (h) NSC, (j) NC.

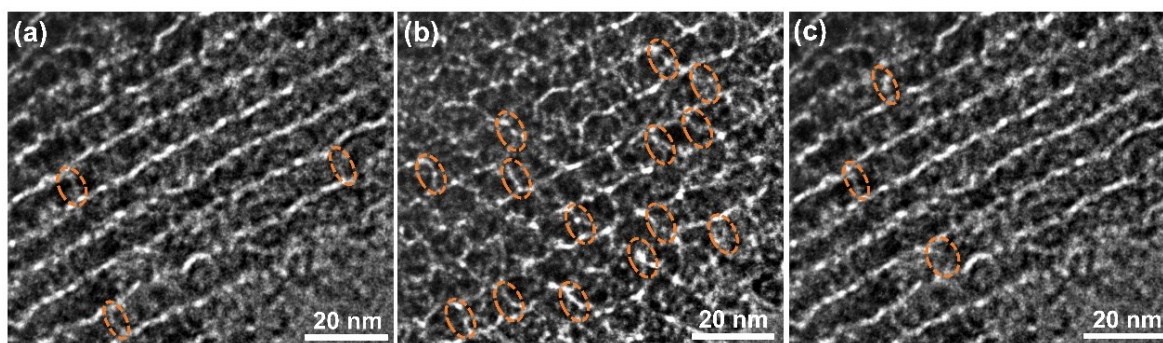

Figure S3 HRTEM images of (a) Fe/NSC-TO, (b) Fe/NC-UI, (c) Fe/NC. Some obvious micropore and mesoporous structures are highlights by saffron yellow circles.

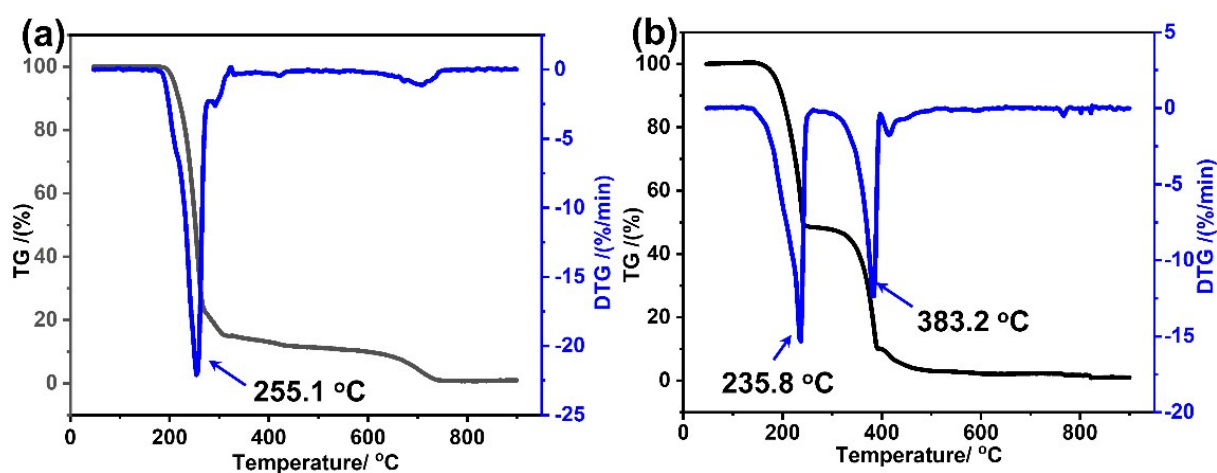

Figure S4 Thermogravimetric analyses of (a) thiourea and (b) urea.

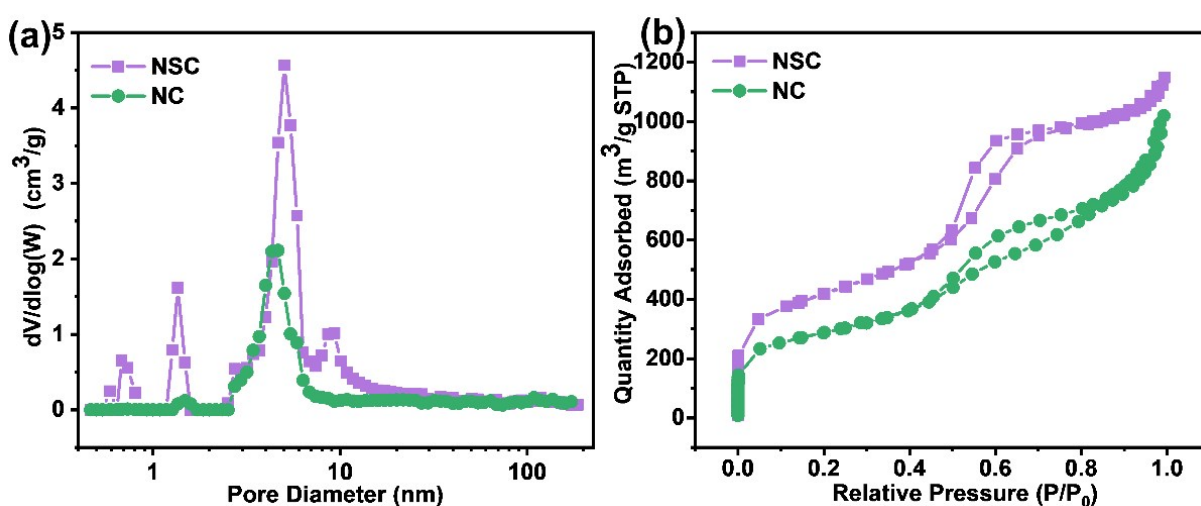

Figure S5 (a) Nitrogen adsorption–desorption isotherms spectra and (b) pore size distribution (PSD) curves of NSC and NC, respectively.

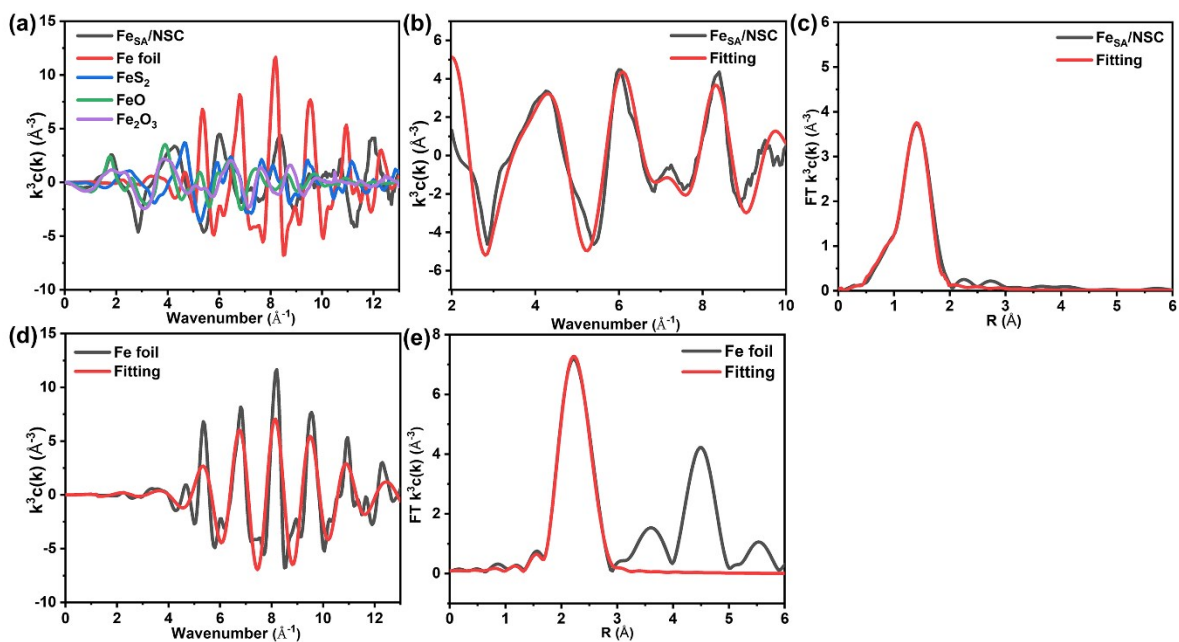

Figure S6 (a) The  $k^3$ -weighted EXAFS in  $K$ -space for Fe<sub>SA</sub>/NSC, Fe foil, FeS<sub>2</sub>, FeO and Fe<sub>2</sub>O<sub>3</sub>, (b) Fe  $K$ -space (c) FT-EXAFS fitting curves of the Fe<sub>SA</sub>/NSC at Fe K-edge. (d) Fe  $K$ -space (e) FT-EXAFS fitting curves of the Fe-foil at Fe K-edge.

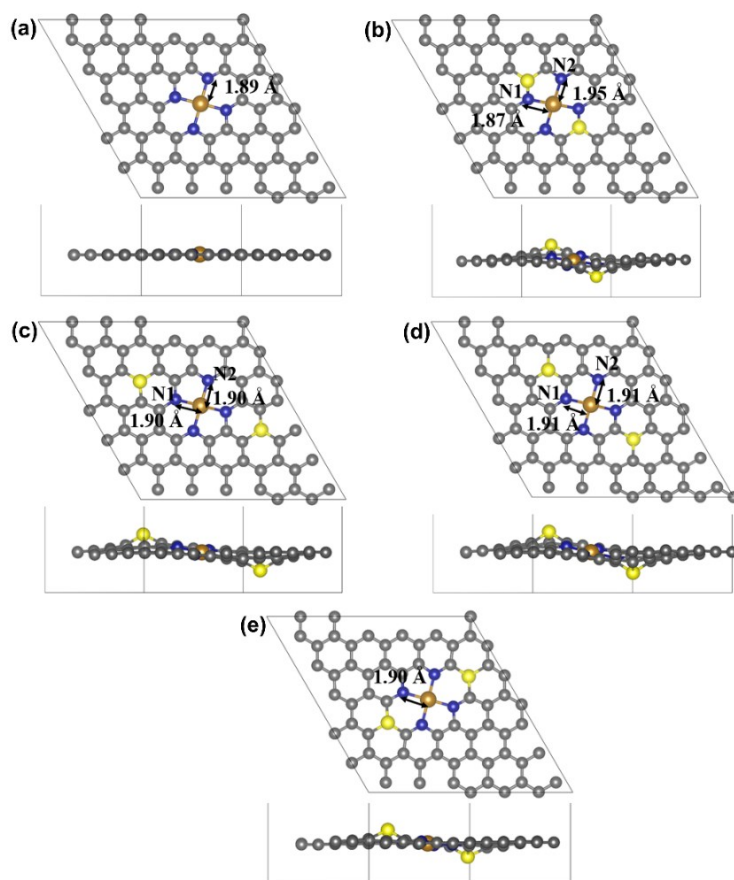

Figure S7 (a) Top and side view of FeN<sub>4</sub> model. (b-e) Optimized geometries of four types possible FeN<sub>4</sub>S<sub>2</sub> active site structure. Fe-N bond lengths are also presented. Corresponding element: S (yellow), N (blue), Fe (gold), C (gray).

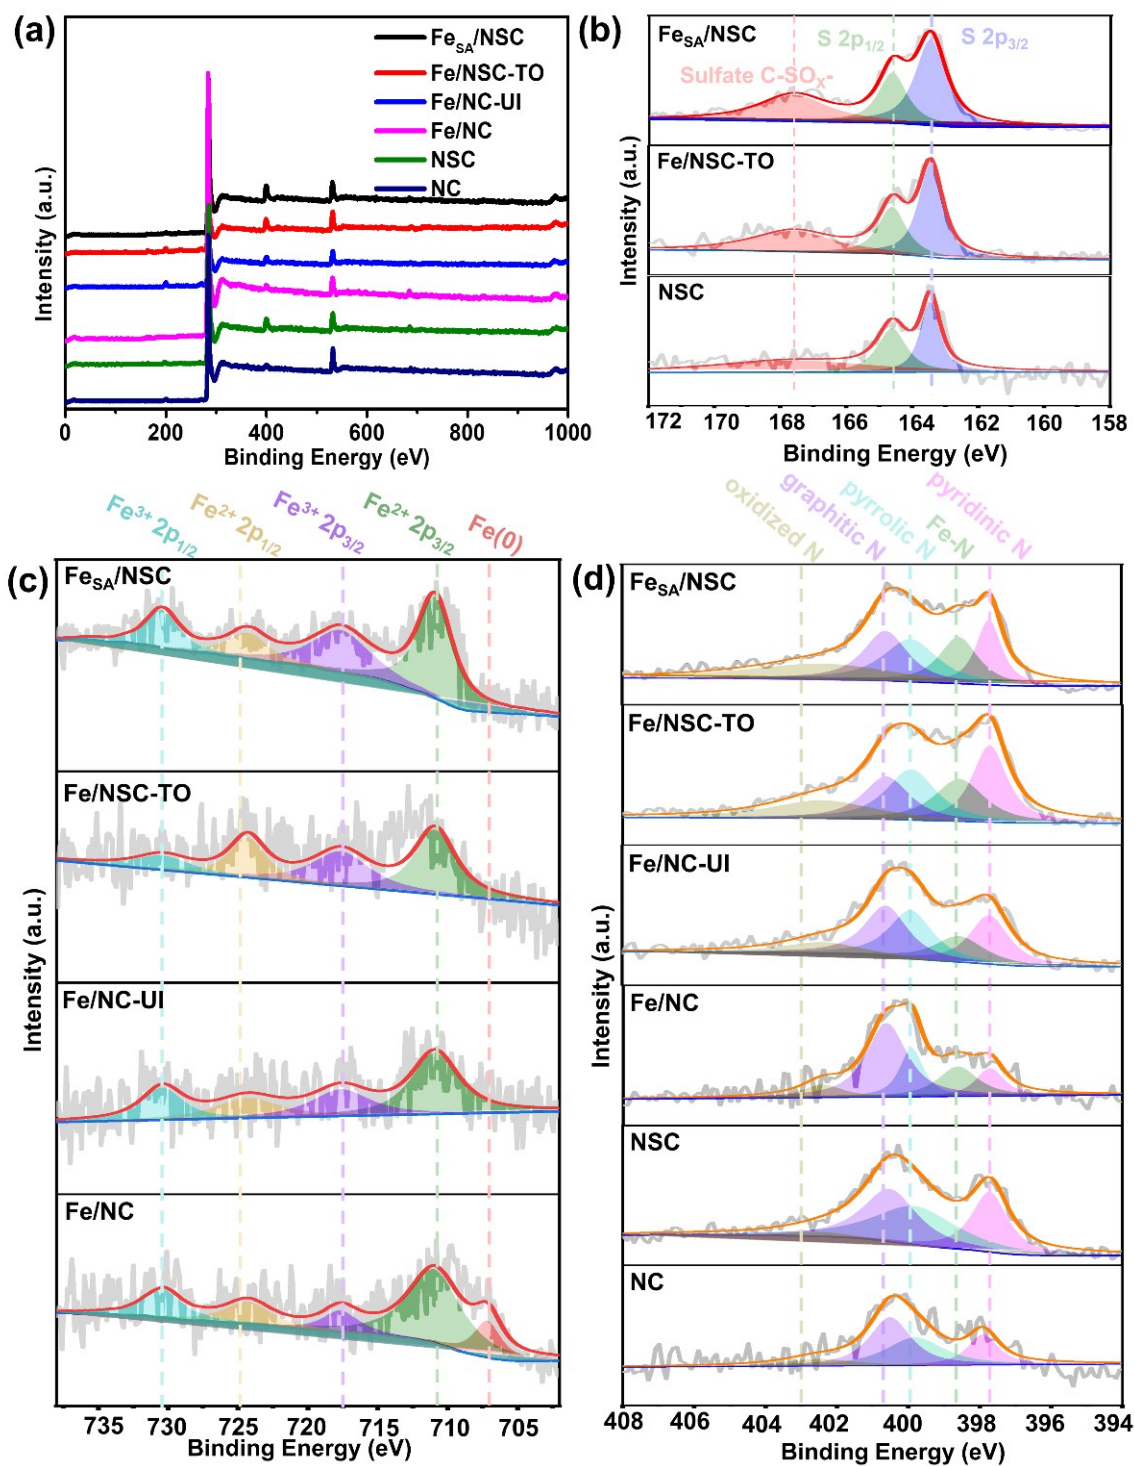

Figure S8 (a) The wide-range XPS spectra of catalysts; (b) The high-resolution S 2p spectra of Fe<sub>SA</sub>/NSC, Fe/NSC-TO and NSC. (c) The high-resolution Fe 2p XPS spectrum of Fe<sub>SA</sub>/NSC, Fe/NSC-TO, Fe/NC-UI, Fe/NC. (d) The high-resolution N 1s spectra of Fe<sub>SA</sub>/NSC, Fe/NSC-TO, Fe/NC-UI, Fe/NC, NSC, NC

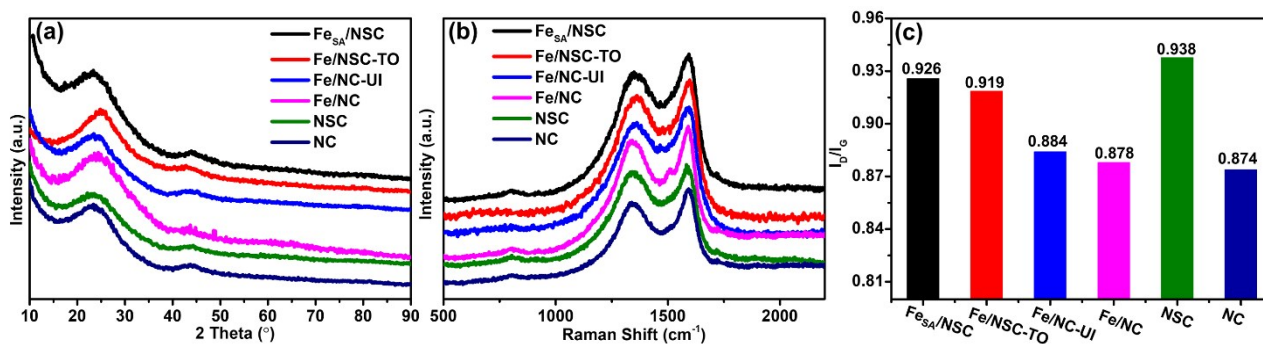

Figure S9 (a) XRD, (b) Raman spectra and (c)  $I_D/I_G$  ratio of Fe<sub>S<sub>A</sub></sub>/NSC, Fe/NSC-TO, Fe/NC-UI, Fe/NC, NSC and NC, respectively.

As shown in Figure S9b, the corresponding Raman spectra showed obvious characteristic D and G bands at about 1350 cm<sup>-1</sup> and 1589 cm<sup>-1</sup>, which are assigned to sp<sup>3</sup> defective sites and sp<sup>2</sup>-hybridized graphitic carbon atoms, respectively. Figure S9c showed that the ratio of  $I_D/I_G$  of the Fe<sub>S<sub>A</sub></sub>/NSC (0.926) is larger than those of Fe/NSC-TO (0.919), Fe/NC-UI (0.884) and Fe/NC (0.878). The possible reason is the enrichment of structural defects after the doping of S and the forming of HOPC structures.

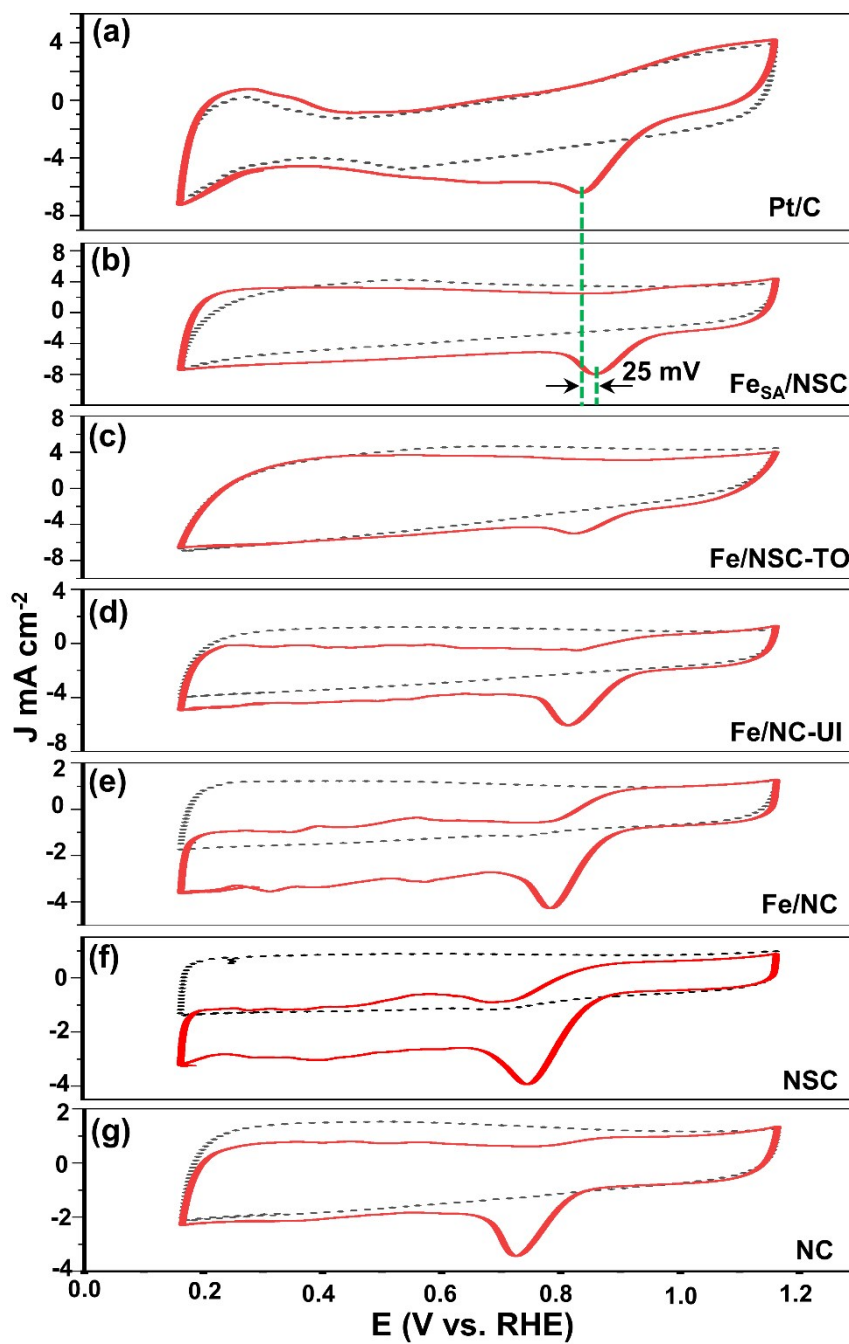

Figure S10 Cyclic voltammograms of different catalysts in  $N_2$ - (black dotted line) and  $O_2$ - (red line) saturated 0.1 M KOH solution at a scan rate of  $50 \text{ mV s}^{-1}$ : (a) Pt/C, (b)  $Fe_{SA}/NSC$ , (c)  $Fe/NSC-TO$ , (d)  $Fe/NC-UI$ , (e)  $Fe/NC$ , (f)  $NSC$ , (g)  $NC$ .



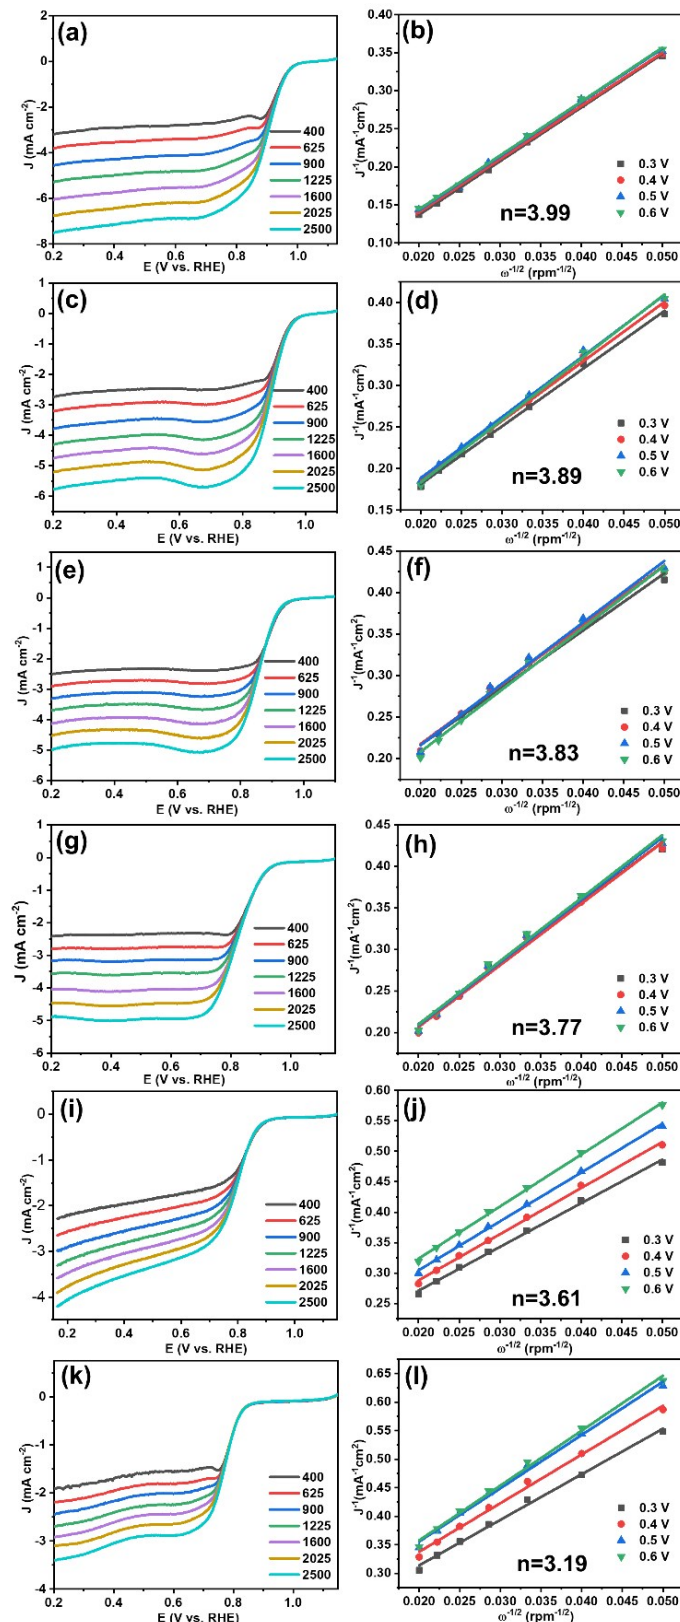

Figure S11 LSV curves of (a) Fe<sub>SA</sub>/NSC, (c) Fe/NSC-TE, (e) Fe/NC-UI, (g) Fe/NC, (i) NSC, (k) NC at different rotating speeds in 0.1 M KOH, respectively. The corresponding K-L plots at different potentials: (b) Fe<sub>SA</sub>/NSC, (d) Fe/NSC-TO, (f) Fe/NC-UI, (h) Fe/NC, (j) NSC, (l) NC.

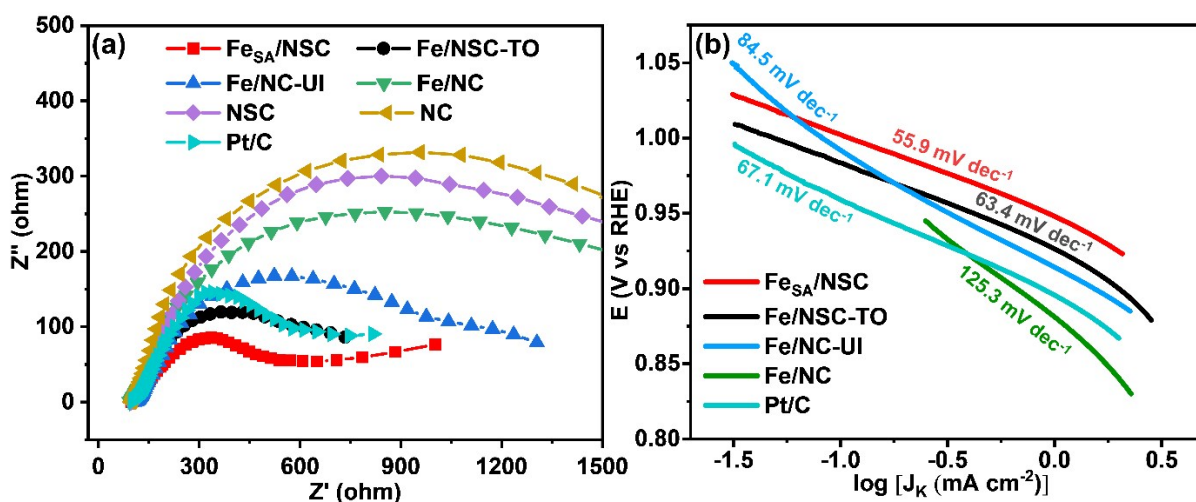

Figure S12 (a) The electrochemical impedance spectrum of  $\text{Fe}_{\text{SA}}/\text{NSC}$ ,  $\text{Fe}/\text{NSC-TO}$ ,  $\text{Fe}/\text{NC-UI}$ ,  $\text{Fe}/\text{NC}$ ,  $\text{NSC}$ ,  $\text{NC}$  and  $\text{Pt}/\text{C}$ . (b) Tafel slopes of  $\text{Fe}_{\text{SA}}/\text{NSC}$ ,  $\text{Fe}/\text{NSC-TO}$ ,  $\text{Fe}/\text{NC-UI}$ ,  $\text{Fe}/\text{NC}$  and  $\text{Pt}/\text{C}$  catalysts.

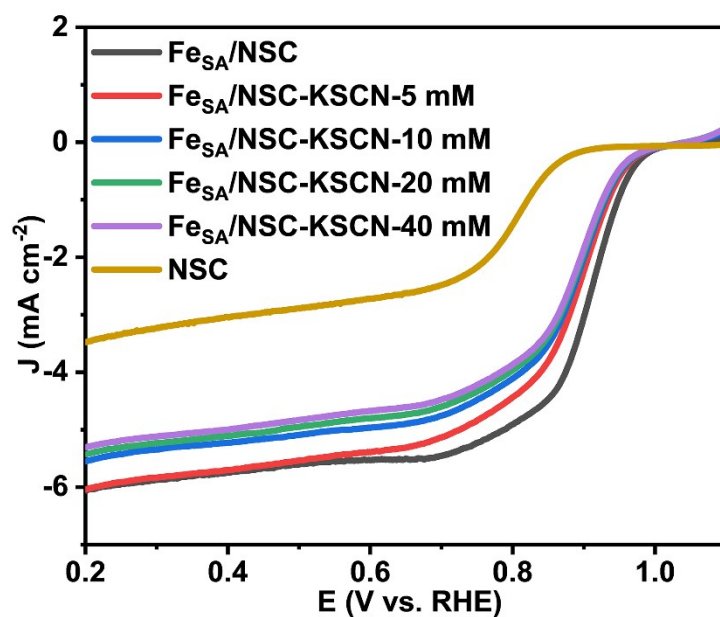

Figure S13 Steady-state ORR polarization curves of  $\text{Fe}_{\text{SA}}/\text{NSC}$  recorded in  $\text{O}_2$  saturated 0.1 M  $\text{KOH}$ , ORR polarization curves of  $\text{Fe}_{\text{SA}}/\text{NSC}$  poisoning by 5 mM 10 mM, 20 mM and 40 mM  $\text{SCN}^-$  and the ORR polarization curves of  $\text{NSC}$ .

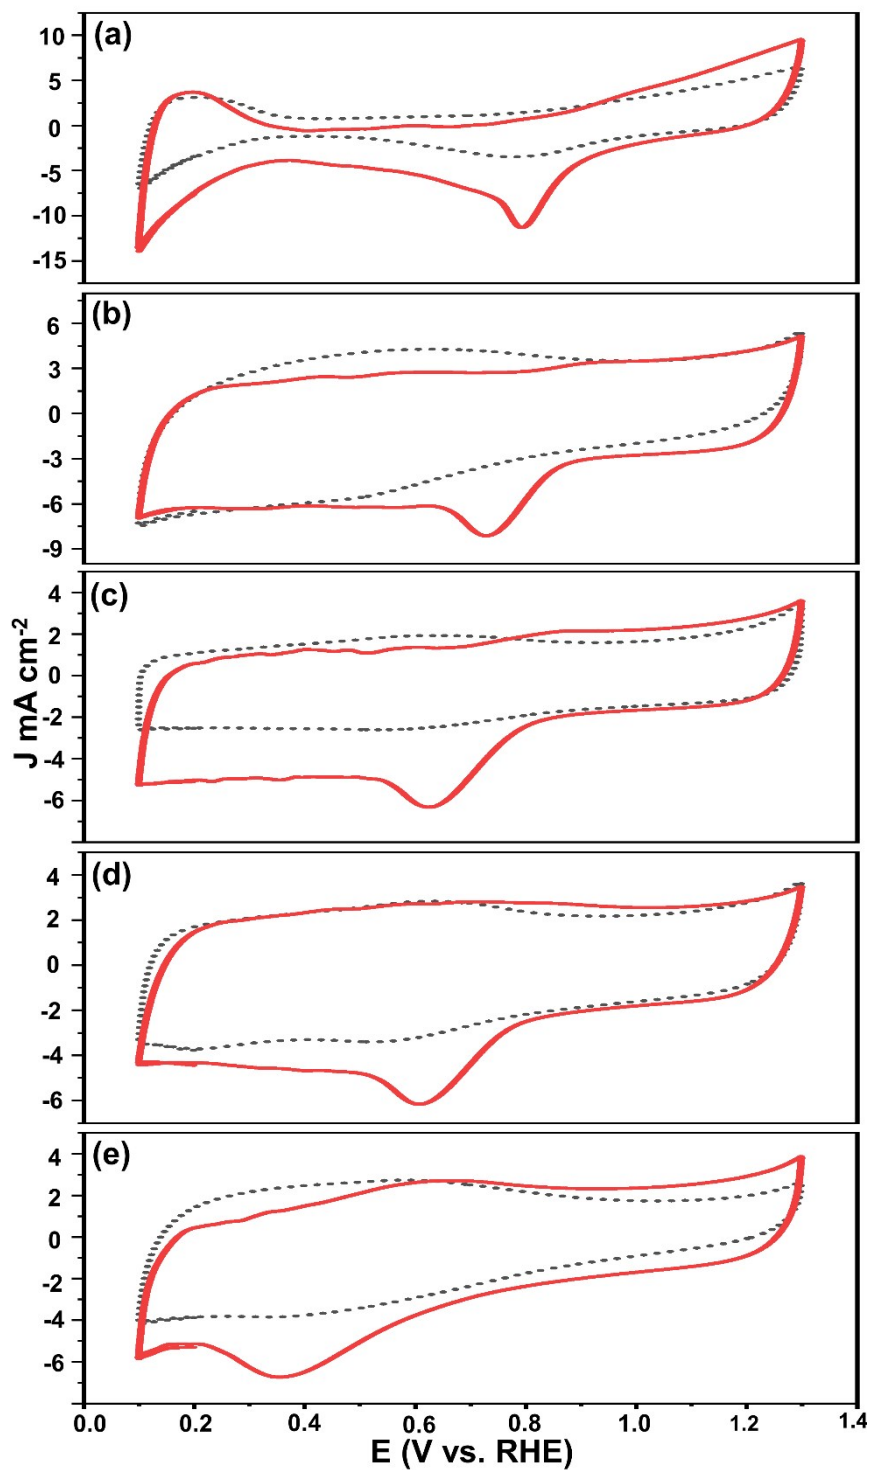

Figure S14 Cyclic voltammetry curves of different catalysts in  $N_2$ - (black dotted line) and  $O_2$ - (red line) saturated 0.1 M  $HClO_4$  solution with a scan rate of  $50 \text{ mV s}^{-1}$ : (a) Pt/C, (b)  $Fe_{SA}/NSC$ , (c)  $Fe/NSC\text{-TO}$ , (d)  $Fe/NC\text{-UI}$  and (e)  $Fe/NC$ .

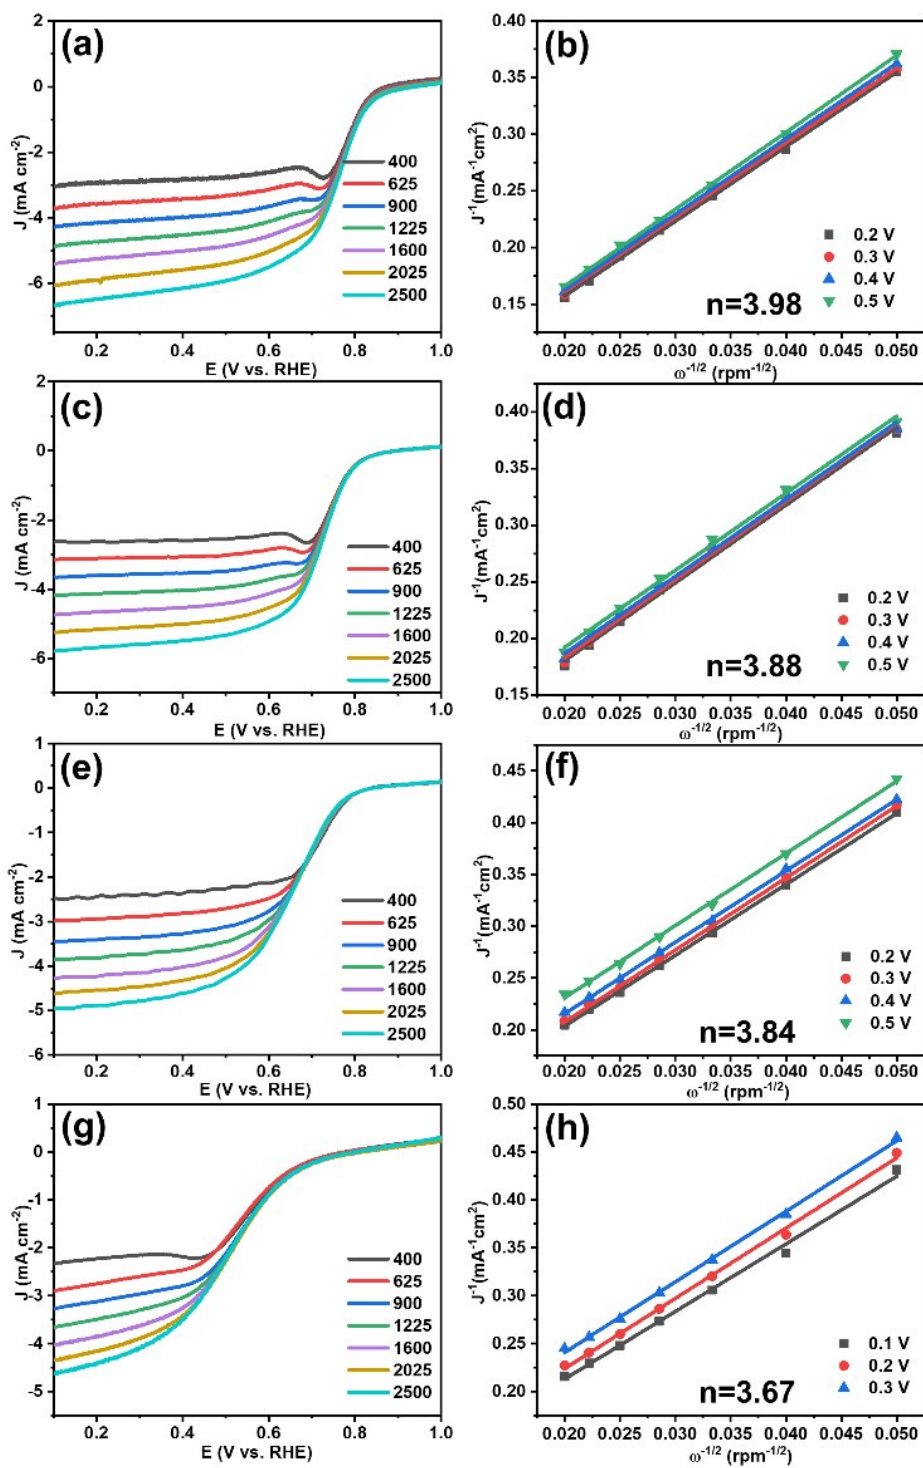

Figure S15 LSV curves of (a) Fe<sub>SA</sub>/NSC, (c) Fe/NSC-TO, (e) Fe/NC-UI and (g) Fe/NC at different rotating speeds in 0.1 M HClO<sub>4</sub> solution, respectively. The corresponding K-L plots at different potentials, (b) Fe<sub>SA</sub>/NSC, (d) Fe/NSC-TO, (f) Fe/NC-UI and (h) Fe/NC, respectively.

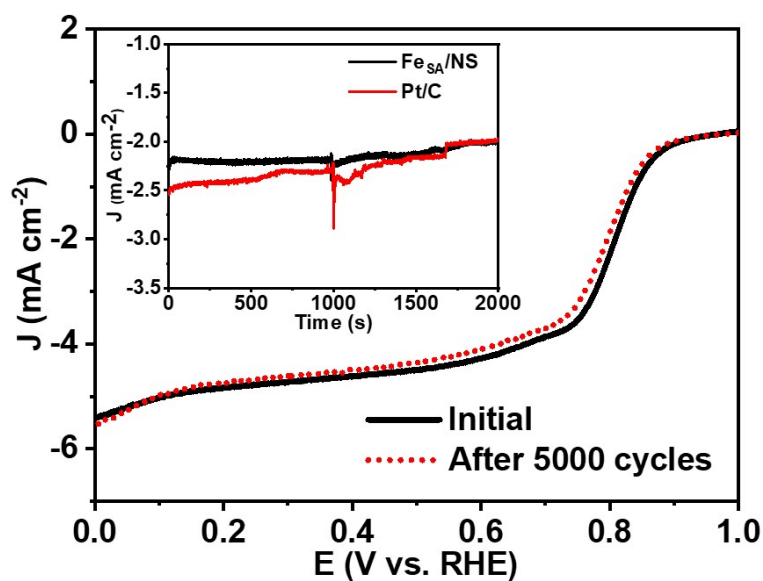

Figure S16 Stability test of  $\text{Fe}_{\text{SA}}/\text{NSC}$  (inset: chronoamperometric curves of a methanol crossover test at 0.5 V before and after adding of 0.5 M methanol) in 0.1 M  $\text{HClO}_4$

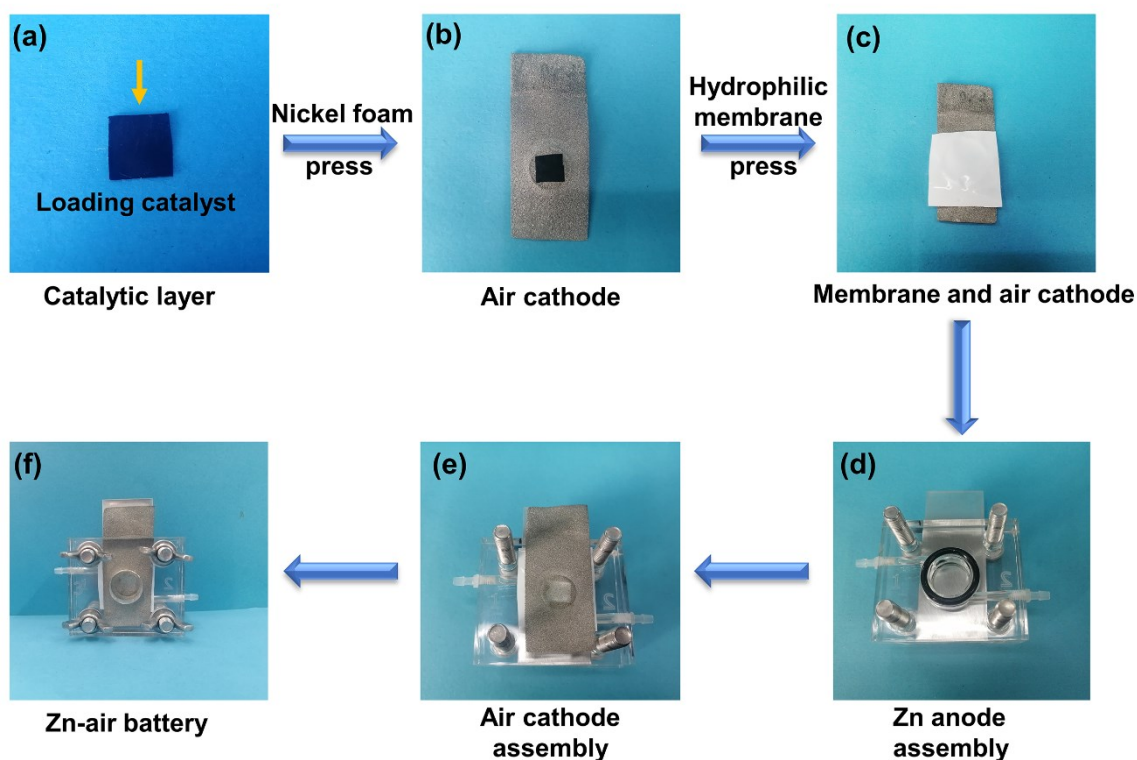

Figure S17 Photographs of the assembly process of Zn-air battery: (a) catalytic layer, (b) air cathode, (c) hydrophilic membrane and air cathode, (d) Zn anode assembly, (e) air cathode assembly, (f) Zn-air battery.

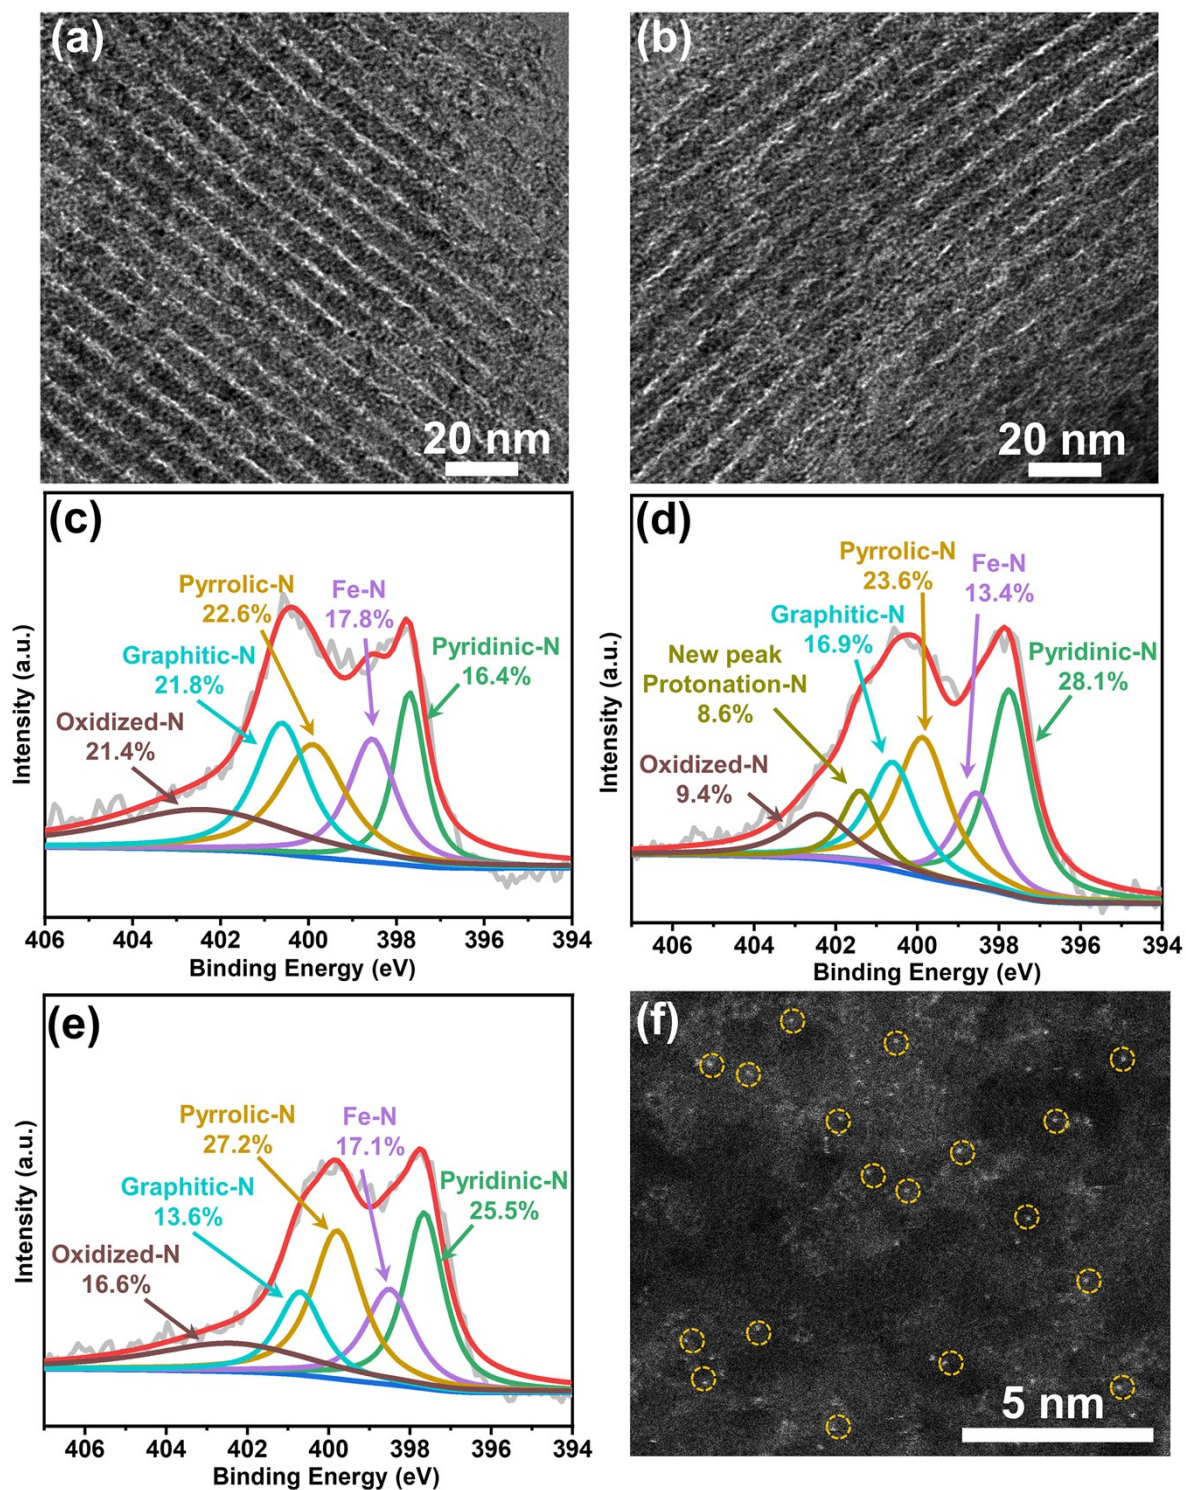

Figure S18 HRTEM images of Fe<sub>SA</sub>/NSC after 5000 cycles between 0.8 and 1.1 V versus RHE in (a) 0.1 M KOH and (b) 0.1 M HClO<sub>4</sub> solutions. High-resolution of N1s spectra of Fe<sub>SA</sub>/NSC (c) before and after 5000 cycles in (e) 0.1 M KOH and (d) 0.1 M HClO<sub>4</sub> solutions.

(f) High-resolution HAADF-STEM images of the  $\text{Fe}_{\text{SA}}/\text{NSC}$  after stability test in acidic electrolyte.

As shown in Figure S18a and b, the  $\text{Fe}_{\text{SA}}/\text{NSC}$  still maintained the original ordered porous structures, and no metal agglomeration was observed after 5000 cycles in 0.1 M KOH and 0.1 M  $\text{HClO}_4$  solutions. In addition, to deeply understand the origin of the stability in both alkaline and acidic media, XPS measurements were adopted to measure the changes of N types. High-resolution N1s spectra of original  $\text{Fe}_{\text{SA}}/\text{NSC}$  can be fitted into five peaks, pyridinic N at 397.8 eV, Fe-N at 398.6 eV, pyrrolic N at 399.9 eV, graphitic N at 400.7 eV and oxidized N at 402.4 eV. In this paper, the catalytic center of  $\text{Fe}_{\text{SA}}/\text{NSC}$  is Fe-N relative sites. Thus, we focus on the changes of Fe-N peaks. After 5000 CV cycles in alkaline solutions, the contents of Fe-N exhibits a relatively small decrease (from 17.8% to 17.1% in Figure S18c and e). After stability measurement, a new peak associated with the protonation of pyridinic-N was observed at around 401.4 eV (protonation-N)<sup>1</sup>. Moreover, we found that the contents of the Fe-N shows a decrease from 17.8% to 13.4%. This may be one of the reason why the stability of the  $\text{Fe}_{\text{SA}}/\text{NSC}$  in alkaline media is better than that of acid media. Moreover, considering that the obvious decrease of the Fe-N content after stability test in acid media, We used HAADF-STEM to monitor the dispersed state of the Fe species, which displays that Fe species were still atomically dispersed on the carbon support (marked with yellow circles) after stability test in acid media.

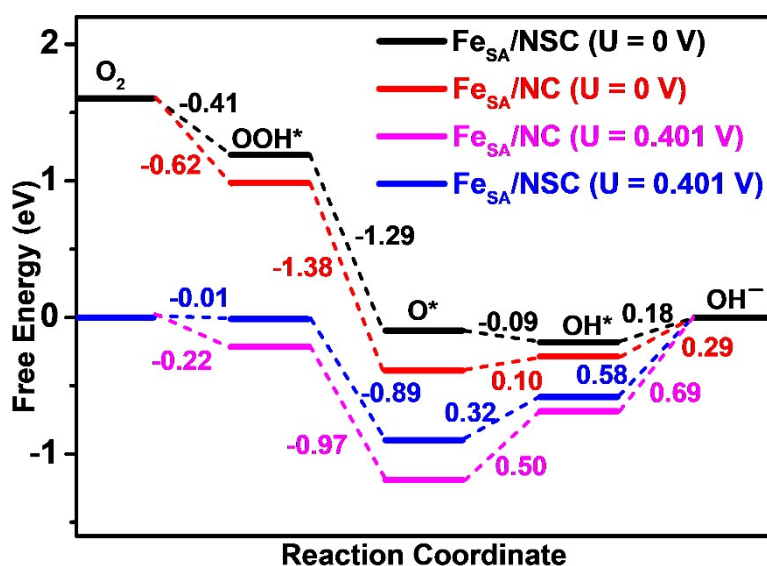

Figure S19 The Gibbs free energy diagram of ORR on  $\text{Fe}_{\text{SA}}/\text{NSC}$  and  $\text{Fe}_{\text{SA}}/\text{NC}$  under alkaline condition by DFT calculations.

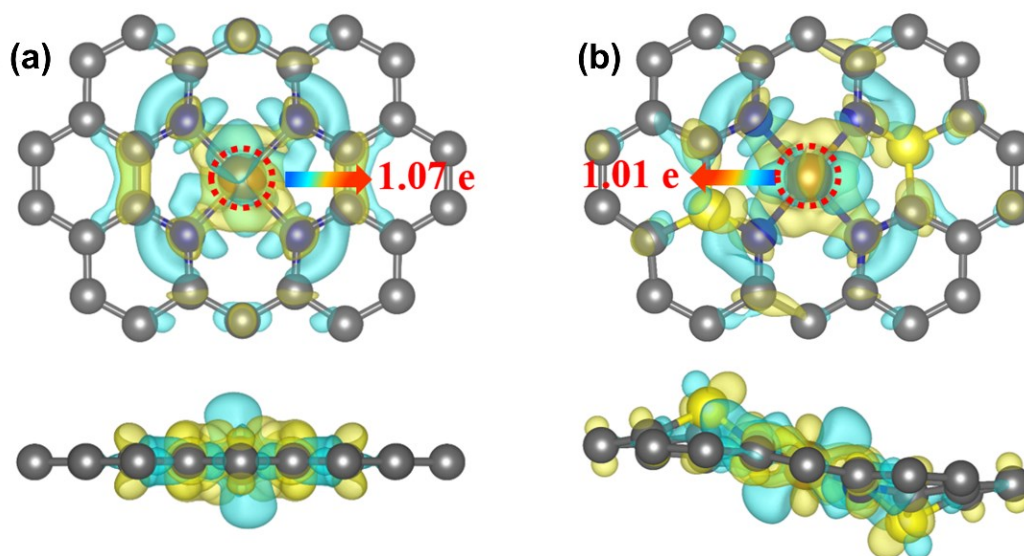

Figure S20 Top and side views of the charge density difference and Bader charge analysis for (a)  $\text{Fe}_{\text{SA}}/\text{NC}$  and (b)  $\text{Fe}_{\text{SA}}/\text{NSC}$ . The isosurface level is  $0.003 \text{ e}/\text{\AA}^3$ . Yellow and cyan areas represent electron accumulation and depletion regions.

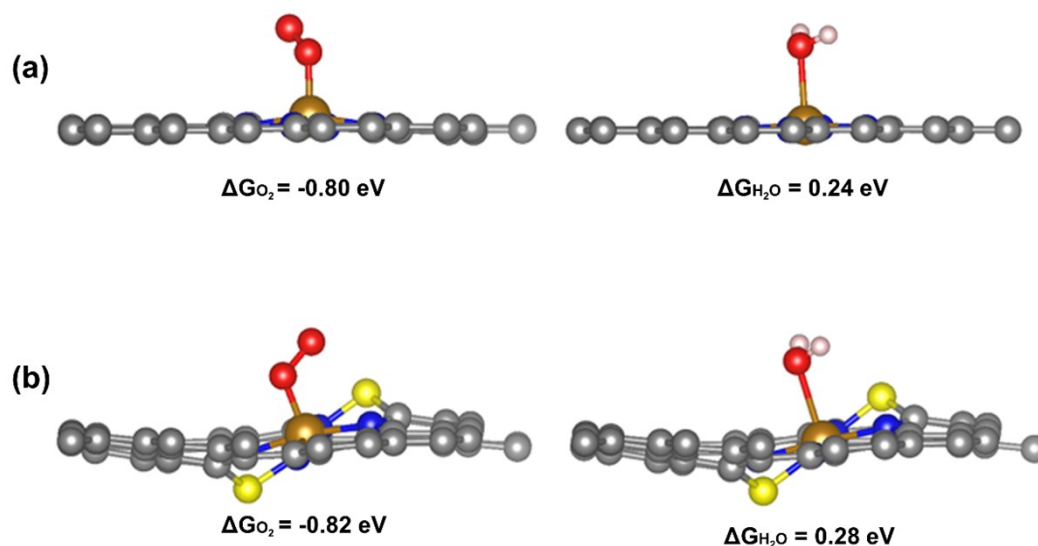

Figure S21 Adsorption free energy of  $\text{O}_2$  or  $\text{H}_2\text{O}$  on (a)  $\text{Fe}_{\text{SA}}/\text{NSC}$  and (b)  $\text{Fe}_{\text{SA}}/\text{NC}$ .

Table S1 Bond lengths of  $\text{O}_2$  molecules,  $\text{O}_{\text{next-nearest}}\text{-Fe}$ ,  $\text{O}_{\text{nearest}}\text{-Fe}$ ,  $\text{H}_2\text{O}\text{-Fe}$  on  $\text{Fe}_{\text{SA}}/\text{NSC}$  and  $\text{Fe}_{\text{SA}}/\text{NC}$  from Figure S21

|                                            | $\text{Fe}_{\text{SA}}/\text{NC}$ ( $\text{\AA}$ ) | $\text{Fe}_{\text{SA}}/\text{NSC}$ ( $\text{\AA}$ ) |
|--------------------------------------------|----------------------------------------------------|-----------------------------------------------------|
| O-O                                        | 1.299                                              | 1.313                                               |
| $\text{O}_{\text{next-nearest}}\text{-Fe}$ | 2.773                                              | 2.631                                               |
| $\text{O}_{\text{nearest}}\text{-Fe}$      | 1.815                                              | 1.792                                               |
| $\text{H}_2\text{O}\text{-Fe}$             | 2.362                                              | 2.405                                               |

As shown in Figure S21,  $\text{O}_2$  molecule is adsorbed on the  $\text{Fe}_{\text{SA}}/\text{NSC}$  site in the end-on model with a adsorption free energy ( $\Delta G_{\text{O}_2}$ ) of  $-0.82 \text{ eV}$ , which is lower than that on the  $\text{Fe}_{\text{SA}}/\text{NC}$  site



(-0.80 eV). On the contrary, the adsorption free energy of H<sub>2</sub>O on the Fe<sub>SA</sub>/NSC and Fe<sub>SA</sub>/NC sites was 0.28 eV and 0.24 eV, respectively. The results indicate that Fe<sub>SA</sub>/NSC could bind O<sub>2</sub> more efficiently to initiate the ORR and bind H<sub>2</sub>O weakly to complete the reaction. In addition, the bond lengths (1.313 Å) of O<sub>2</sub> molecules adsorbed on the surface of Fe<sub>SA</sub>/NSC is longer than that of Fe<sub>SA</sub>/NC (1.299 Å), which shows that Fe<sub>SA</sub>/NSC can activate O<sub>2</sub> molecules favorably. At the same time, for Fe<sub>SA</sub>/NC and Fe<sub>SA</sub>/NSC systems, the bond lengths of O<sub>nearest</sub>-Fe is basically the same. The bond length of O<sub>next-nearest</sub>-Fe (2.773 Å) in Fe<sub>SA</sub>/NC is greater than that of Fe<sub>SA</sub>/NSC (2.631 Å), indicating that the difference in O<sub>2</sub> adsorption energy is mainly due to the difference in O<sub>next-nearest</sub>-Fe bond lengths. Furthermore, the bond length of H<sub>2</sub>O-Fe (2.405 Å) in Fe-SAs/NSC is greater than that in Fe<sub>SA</sub>/NC (2.362 Å), indicating favorable desorption of H<sub>2</sub>O.

Table S2 EXAFS fitting parameters at the Fe K-edge for various samples ( $S_0^2=0.85$ )

| Sample                | Bond type | N1  | R(Å) | $\sigma^2 \times 10^{-3}$ (Å <sup>2</sup> ) | $\Delta E_0$ (eV) | R factor |
|-----------------------|-----------|-----|------|---------------------------------------------|-------------------|----------|
| Fe <sub>SA</sub> /NSC | Fe-N1     | 1.9 | 1.98 | 8.2                                         | 2.9               | 0.006    |
|                       | Fe-N2     | 2.1 | 1.87 | 7.3                                         |                   |          |
| FePC                  | Fe-N      | 4.0 | 1.99 | 8.1                                         | 8.0               | 0.013    |
| Fe foil               | Fe-Fe     | 8*  | 2.47 | 4.7                                         | 5.8               | 0.001    |
|                       | Fe-Fe     | 6*  | 2.84 | 5.2                                         | 4.1               |          |

(a) N is the coordination number. (b) R is the distance between the absorber and scatterer atoms; (c)  $\sigma^2$  is Debye–Waller factor to account for thermal and structural disorders; (d)  $\Delta E_0$  is inner potential correction.

Table S3 Fe-N bond length information of Fe<sub>SA</sub>/NSC and Fe<sub>SA</sub>/NC from DFT calculation and EXAFS fitting.

| Sample                | Bond type | DFT                               | EXAFS fitting      |
|-----------------------|-----------|-----------------------------------|--------------------|
|                       |           | calculation<br>Bond length<br>(Å) | Bond length<br>(Å) |
| Fe <sub>SA</sub> /NSC | Fe-N1     | 1.95                              | 1.98               |
|                       | Fe-N2     | 1.87                              | 1.87               |
| Fe <sub>SA</sub> /NC  | Fe-N      | 1.89                              | -                  |

Table S4 Elemental contents of C, O, S, N and Fe based on XPS analysis for the catalysts.

| Sample                | Chemical composition (at%) |      |      |      |      |
|-----------------------|----------------------------|------|------|------|------|
|                       | C                          | O    | S    | N    | Fe   |
| Fe <sub>SA</sub> /NSC | 84.95                      | 5.21 | 1.42 | 8.00 | 0.42 |
| Fe/NSC-TO             | 83.22                      | 7.73 | 1.28 | 7.32 | 0.45 |
| Fe/NC-UI              | 88.73                      | 5.78 | -    | 4.97 | 0.52 |
| Fe/NC                 | 91.22                      | 5.73 | -    | 2.30 | 0.75 |
| NSC                   | 87.65                      | 4.75 | 1.36 | 6.24 | -    |
| NC                    | 92.58                      | 5.91 | -    | 1.51 | -    |

Table S5 Fe contents of Fe<sub>SA</sub>/NSC, Fe/NSC-TO, Fe/NC-UI and Fe/NC catalysts measured by ICP, wt%.

| Catalysts             | Fe content<br>(measured by ICP, wt%) |
|-----------------------|--------------------------------------|
| Fe <sub>SA</sub> /NSC | 1.22                                 |
| Fe/NSC-TO             | 1.35                                 |
| Fe/NC-UI              | 1.06                                 |
| Fe/NC                 | 1.29                                 |

Table S6 Comparison of ORR performance of Fe<sub>SA</sub>/NSC and other non-precious M–N/C, metal free catalysts, precious metal single atom catalysts from the recent literature and this work (1600 rpm)

| Catalysts                                                 | Onset potential (V vs. RHE) | Half-wave potential (V vs. RHE) | Media                                | Reference                                  |
|-----------------------------------------------------------|-----------------------------|---------------------------------|--------------------------------------|--------------------------------------------|
| Fe <sub>SA</sub> /NSC                                     | 1.03                        | 0.91                            | 0.1 M KOH                            | <b>This work</b>                           |
|                                                           | 0.89                        | 0.77                            | 0.1 M HClO <sub>4</sub>              |                                            |
| Fe <sub>SA</sub> /NC                                      | 1.00                        | 0.89                            | 0.1 M KOH                            | Angew. Chem. Int. Ed. 2018, 57, 1-6        |
|                                                           | 0.94                        | 0.84                            | 0.1 M HClO <sub>4</sub>              |                                            |
| Fe-ISA/SNC                                                | 0.99                        | 0.896                           | 0.1 M KOH                            | Adv. Mater. 2018, 30, 1800588              |
|                                                           | ~0.85                       | not mention                     | 0.5 M H <sub>2</sub> SO <sub>4</sub> |                                            |
| Fe-SAs/NSC                                                | 1.00                        | 0.87                            | 0.1 M KOH                            | J. Am. Chem. Soc., 2019, 141, 20118-20126  |
|                                                           | ~0.84                       | ~0.70                           | 0.5 M H <sub>2</sub> SO <sub>4</sub> |                                            |
| Fe-N/P-C-700                                              | 0.941                       | 0.87                            | 0.1 M KOH                            | J. Am. Chem. Soc., 2020, 142, 2404-2412    |
|                                                           | 0.89                        | 0.72                            | 0.1 M HClO <sub>4</sub>              |                                            |
| Fe/SNC                                                    | not mention                 | ~0.86                           | 0.1 M KOH                            | Angew. Chem. Int. Ed., 56, 13800-13804     |
|                                                           | not mention                 | 0.77                            | 0.1 M HClO <sub>4</sub>              |                                            |
| 3D MPC<br>Fe-N-C                                          | 0.98                        | 0.88                            | 0.1 M KOH                            | ACS Catal., 2017, 7, 6144-6149             |
|                                                           | 0.85                        | 0.75                            | 0.1 M HClO <sub>4</sub>              |                                            |
| Co–N/CNFs                                                 | 0.92                        | 0.82                            | 0.1 M KOH                            | ACS Catal., 2017, 7, 6864-6871             |
|                                                           | 0.82                        | 0.70                            | 0.1 M HClO <sub>4</sub>              |                                            |
| Zn/NC                                                     | not mention                 | 0.873                           | 0.1 M KOH                            | Angew. Chem. Int. Ed., 2019, 58, 7035-7039 |
|                                                           | not mention                 | 0.746                           | 0.1 M HClO <sub>4</sub>              |                                            |
| S <sub>1</sub> N <sub>6</sub> C900<br>carbon<br>nanosheet | 0.95                        | 0.83                            | 0.1 M KOH                            | ACS Appl. Mater. Inter., 2017, 9, 398-405  |
|                                                           | 0.785                       | 0.47                            | 0.5 M H <sub>2</sub> SO <sub>4</sub> |                                            |

|                         |       |       |                                      |                                              |
|-------------------------|-------|-------|--------------------------------------|----------------------------------------------|
| N-HC@G-900              | 1.0   | 0.85  | 0.1 M KOH                            | Angew. Chem. Int. Ed., 2018, 57, 16511-16515 |
|                         | 0.80  | 0.65  | 0.5 M H <sub>2</sub> SO <sub>4</sub> |                                              |
| Pt <sub>1</sub> @Pt/NBP | -     | -     | 0.1 M KOH                            | ACS Catal. 2021, 11, 466-475                 |
|                         | ~0.98 | 0.867 | 0.1 M HClO <sub>4</sub>              |                                              |
| Ru-G-750                | -     | -     | 0.1 M KOH                            | Acs Nano 2017, 11, 6930-6941                 |
|                         | 0.89  | 0.75  | 0.1 M HClO <sub>4</sub>              |                                              |
| PtFeNC SACs             | ~1.02 | 0.895 | 0.1 M KOH                            | Appl. Catal. B- Environ. 2021, 286 119891    |
|                         | -     | -     | 0.1 M HClO                           |                                              |

1. Z. Lu, B. Wang, Y. Hu, W. Liu, Y. Zhao, R. Yang, Z. Li, J. Luo, B. Chi, Z. Jiang, M. Li, S. Mu, S. Liao, J. Zhang and X. Sun, *Angew. Chem. Int. Ed.*, 2019, **58**, 2622-2626.
